# Supplementary material
Source: PubMed Central journal article supplement (PMC4969578)
Supplement: EMBJ-35-1707-s001.pdf [file EMBJ-35-1707-s001.pdf]

# Appendix

## Structure of the Frequency-Interacting RNA Helicase: a protein interaction hub for the circadian clock

Karen S. Conrad, Jennifer M. Hurley, Joanne Widom, Carol Ringelberg, Jennifer L. Loros, Jay C. Dunlap and Brian R. Crane

### TABLE of CONTENTS

**Fig. S1:** SAXS data for FRH $\Delta$ 100.

**Fig. S2:** Comparison of the RecA domain orientations in FRH and Mtr4.

**Fig. S3:** Interactions of the KOW domain within the crystal lattice.

**Fig. S4:** Comparison of ADP and RNA binding between FRH and Mtr4.

**Fig. S5:** Immunoprecipitation of FRH with FRQ, WC-1 and WC-2.

**Fig. S6:** Disorder and secondary structure predictions for FRH and FRQ.

**Table S1:** Diffraction data and refinement statistics.

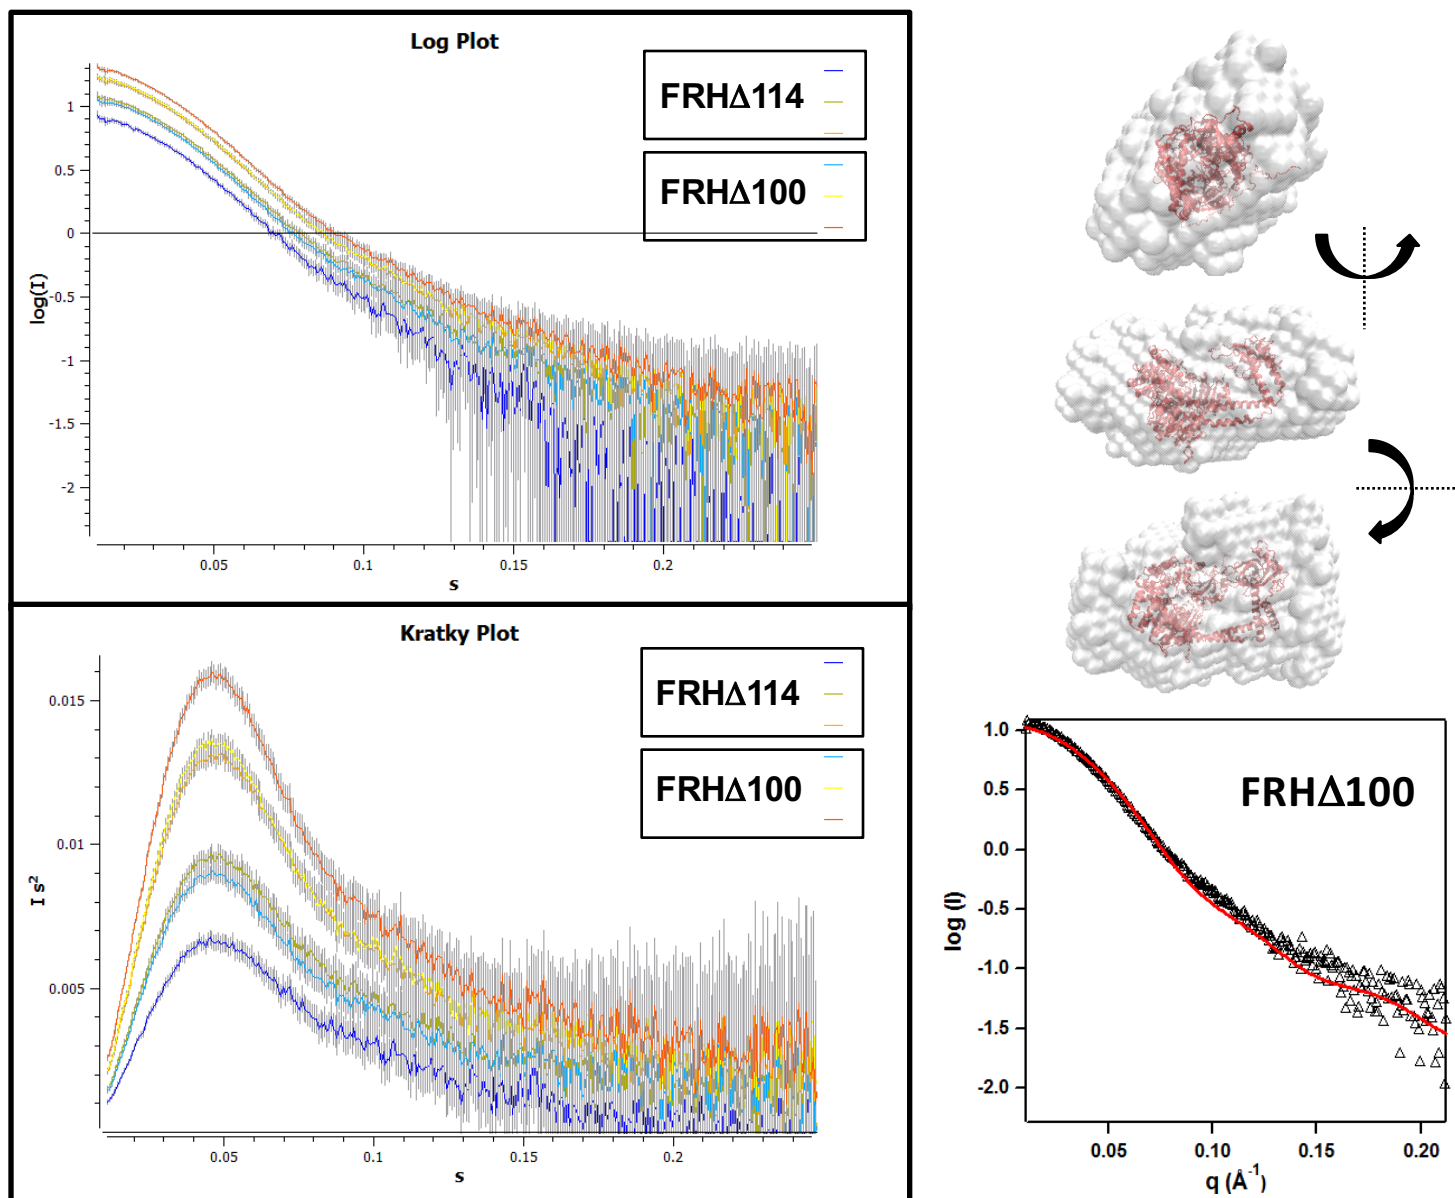

**Figure S1.** Experimental SAXS data (scattering curves above, Kratky plot below) for FRH $\Delta$ 114 (increasing concentration: blue, brown, orange) and FRH $\Delta$ 100 (increasing concentration: cyan, yellow, dark orange). Right: FRH $\Delta$ 100 SAXS data – top, envelope fit with FRH structure, below FoxS analysis fit (red) of FRH $\Delta$ 100 data (triangle data points). The envelopes are larger with FRH $\Delta$ 100 than with FRH $\Delta$ 114 (**Fig. 2**), reflecting the flexibility of the longer N-terminus in the former case.

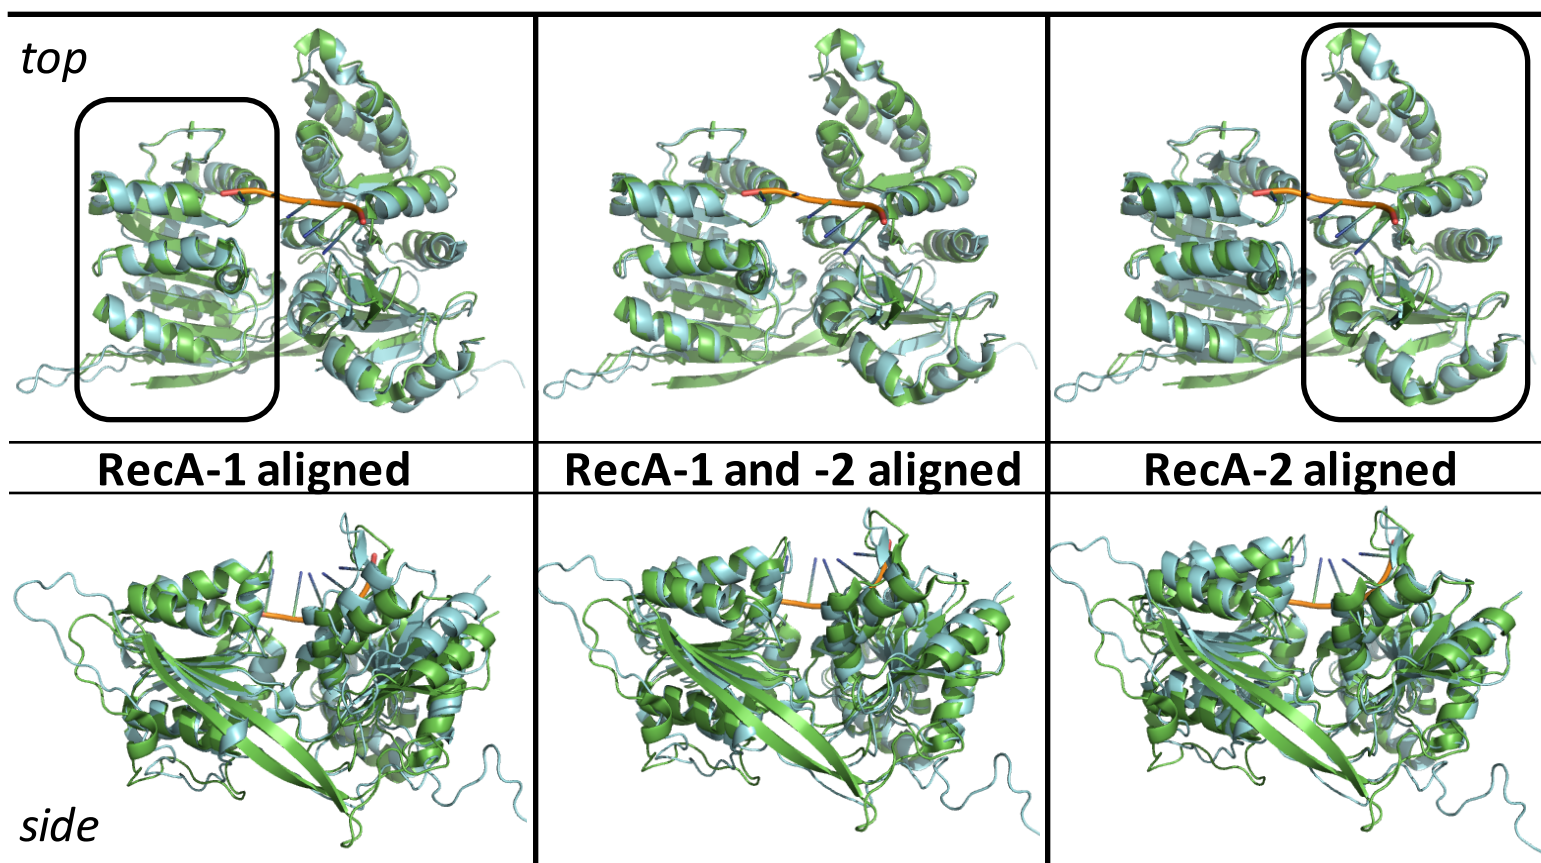

**Figure S2.** The two RecA domains of FRH and Mtr4 have different arrangements. Superpositions of FRH (cyan) and Mtr4 (green, RNA backbone in orange). (Left) RecA-1 are aligned, (center) RecAs aligned as a unit, (right) RecA-2 domains are aligned, with perspective from the top (above), and from the side placed (below).

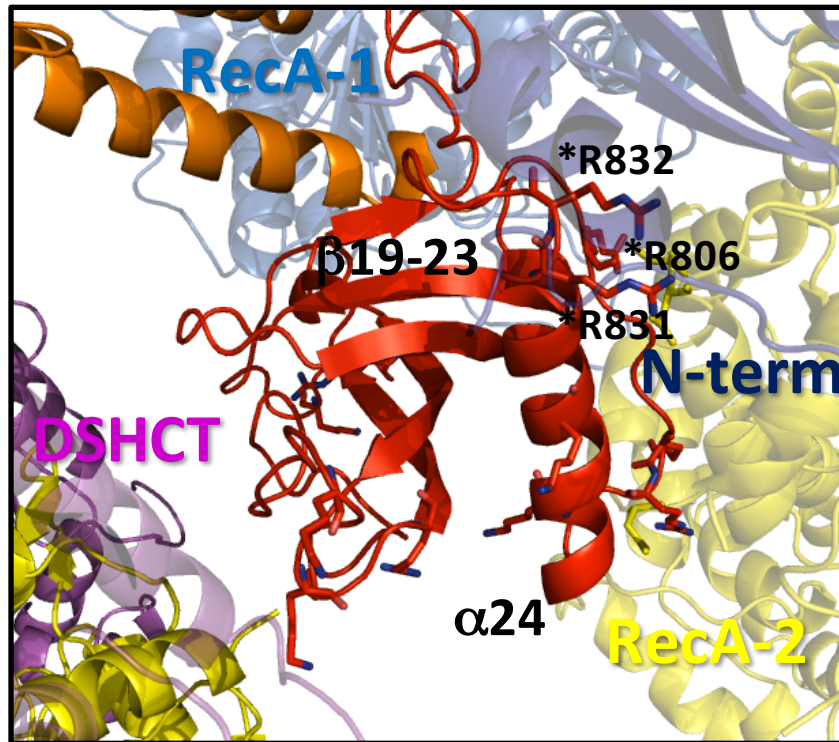

**Figure S3.** Crystal packing and interactions of the FRH KOW domain (red with positively charged residues shown as bonds). FRH symmetry-related molecules (transparent cartoon) are colored according to **Figure 1** (RecA-1, blue; RecA-2, yellow; N-term, dark blue; DSHCT, magenta).

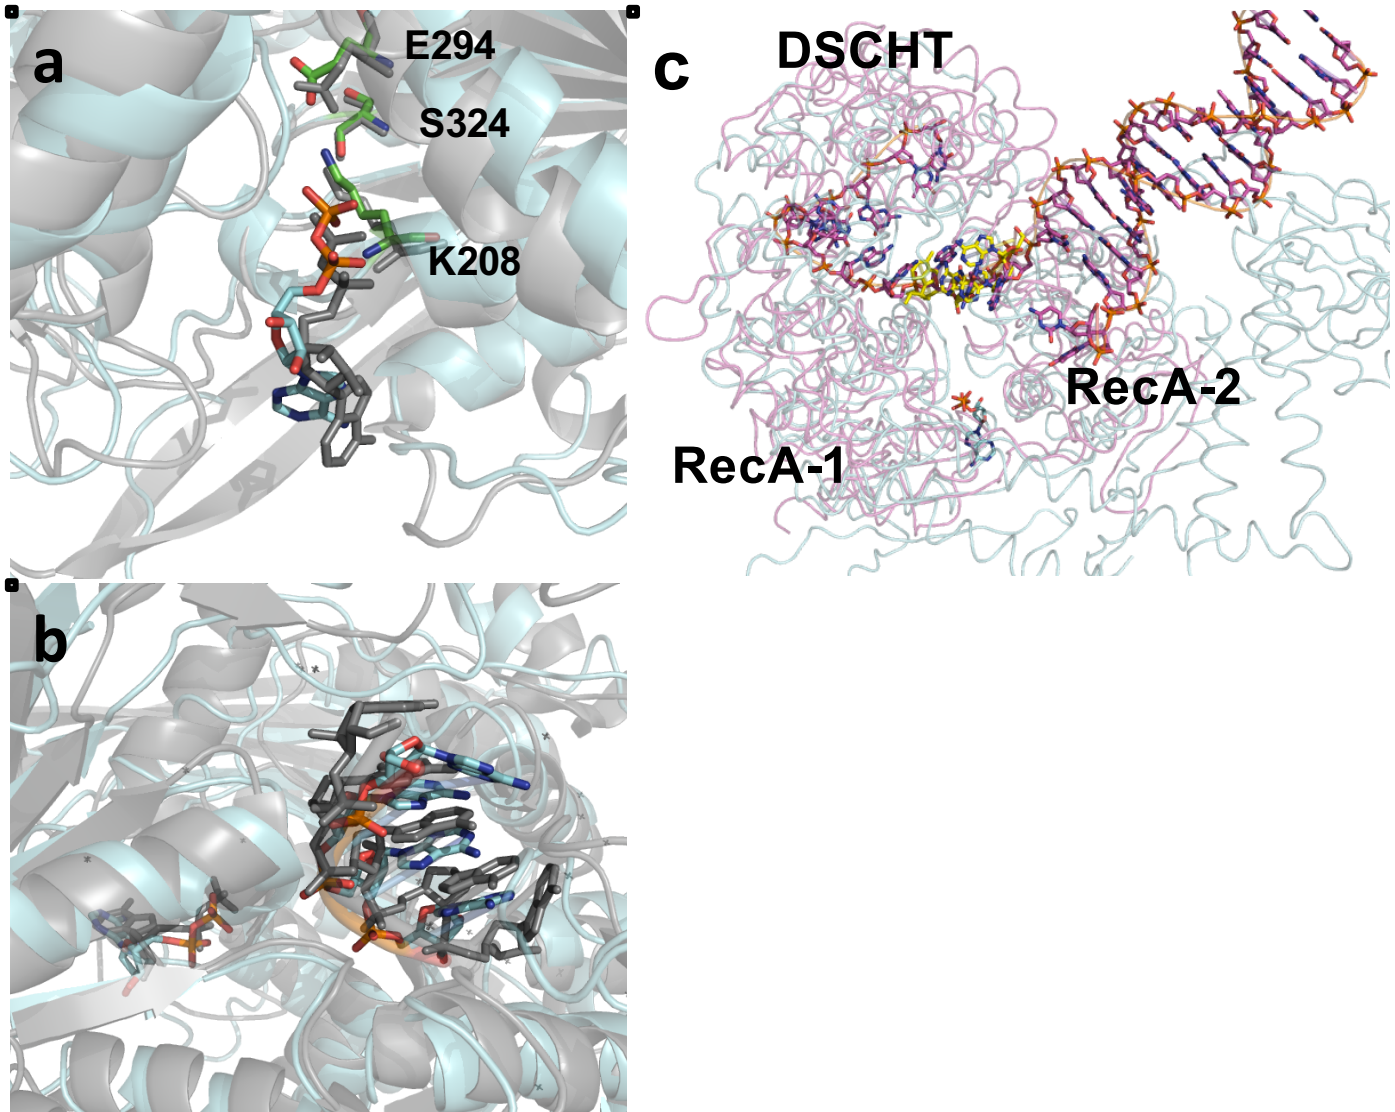

**Figure G4.** Overlays of FRH (cyan) and Mtr4 (gray) structures with ADP (**a** and **b**) and RNA (**b**) shown as bonds. (**c**) Unwound DNA from Hel308 (pdb 2PR6; magenta, DNA in orange bonds) overlaid in FRH with RNA and ADP (FRH in cyan with yellow RNA and cyan ADP in stick) after superposition of the respective RecA domains.

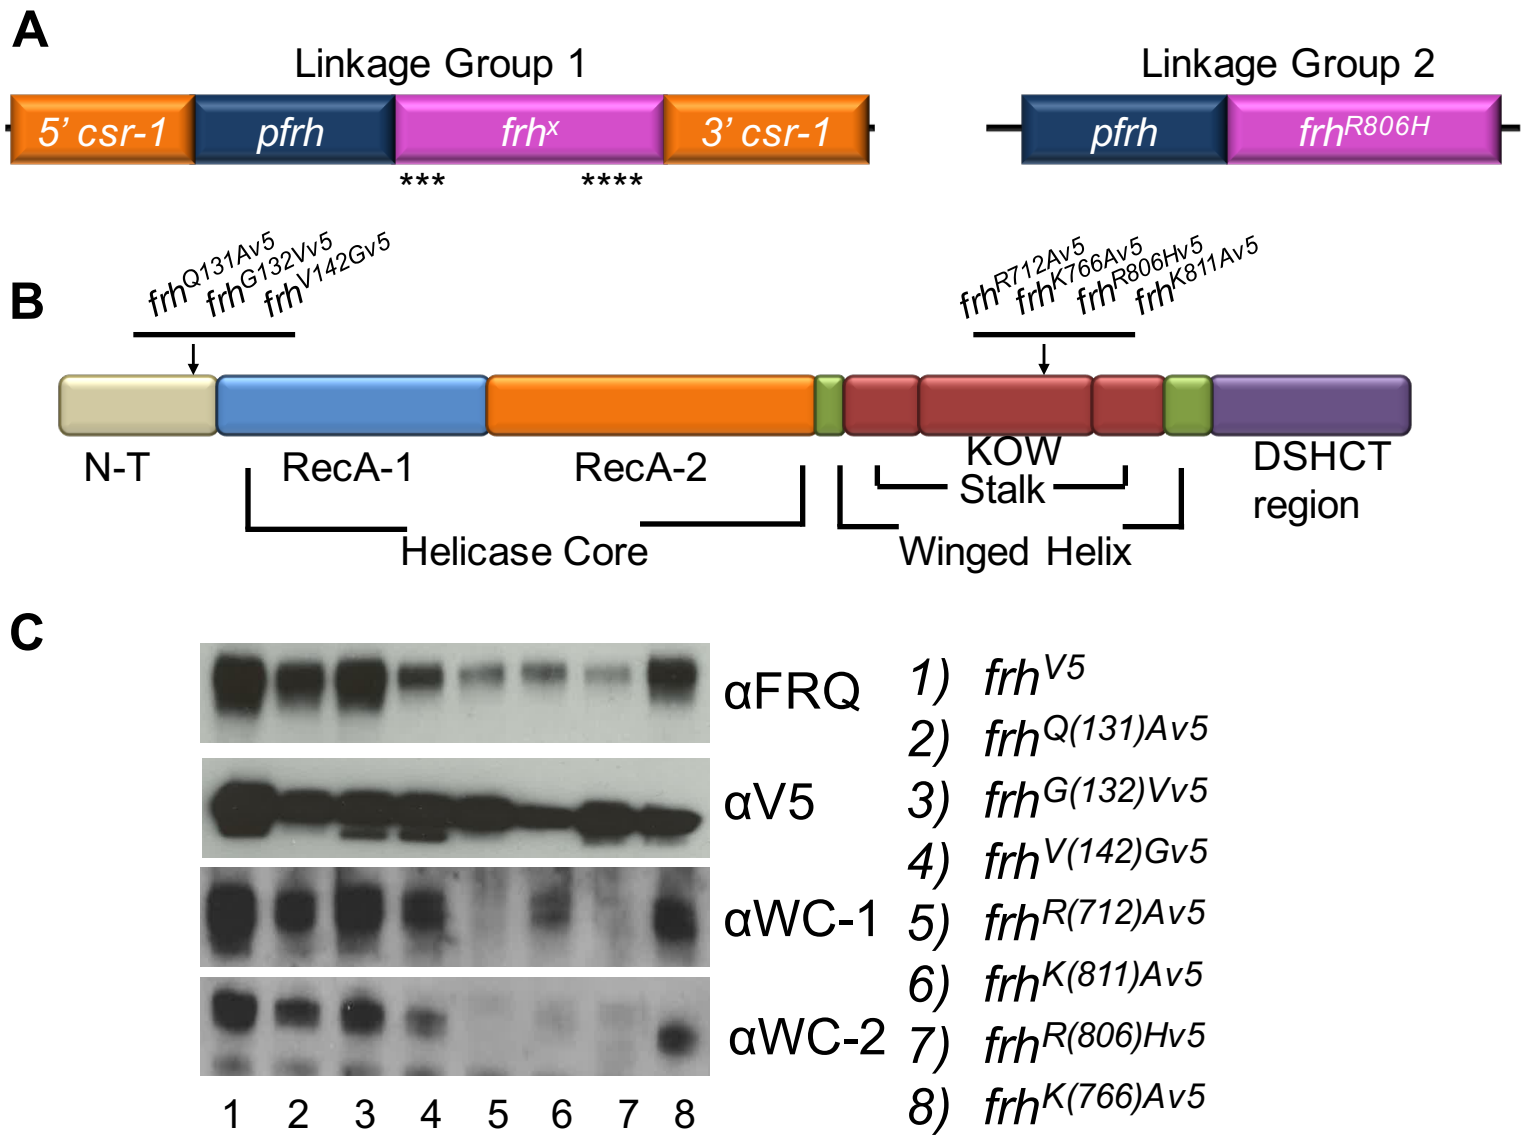

**Figure S5.** The FRH mutant interactions with the core clock components examined by immunoprecipitation. The assay probes the interaction between the core clock components in strains with a wild type copy of FRH and FRH with several different amino acid mutations. **(A)** Strain genotypes of experimental strains: Linkage group 1; at the *csr-1* locus: mutant versions of *frh* driven by the *frh* promoter. Linkage group 2; at the *frh* native locus: *frh<sup>R806H</sup>*. **(B)** FRH domain map indicating location of mutants. **(C)** Western blot of expression and V5 IP of mutant copies of FRH in the WT background confirming expression or interaction with FRQ and the WCC.

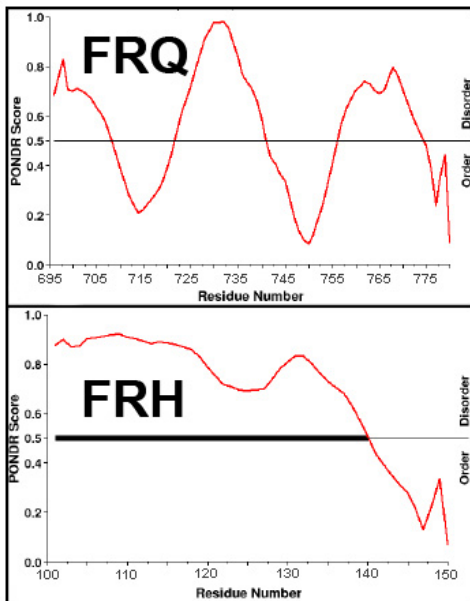

FRQ interacting region:

695-QRTLSGSSLP IRPLSDDRAR VAEVLDFDPG  
 NPPELVADDG SSPNDEDFVF PWCEDPAKVR IQPIAKEVME  
 PSGLGGLVPD DHFVM-778

FRQ interacting region on FRH:

100-DNKRRKKTDE AEPIMTDAFQ TAESREVTGA  
 QGFAPTEGES IVLSHNIQH-150

**Figure S6.** PONDR prediction (see Online Methods) for interaction of FRH and FRQ (order  $< 0.5 <$  disorder). Complementary Jpred prediction colored to denote secondary structure below (red  $\beta$ -sheet, blue  $\alpha$ -helix).

**Table S1.** Data collection and refinement statistics for FRH crystal structures.

|                                                     | FRH-Δ114                                       | FRH-Δ114 (small cell)                          | FRH-Δ100 + ADP/RNA                             |
|-----------------------------------------------------|------------------------------------------------|------------------------------------------------|------------------------------------------------|
| <b>Data collection</b>                              |                                                |                                                |                                                |
| Space group                                         | P 2 <sub>1</sub> 2 <sub>1</sub> 2 <sub>1</sub> | P 2 <sub>1</sub> 2 <sub>1</sub> 2 <sub>1</sub> | P 2 <sub>1</sub> 2 <sub>1</sub> 2 <sub>1</sub> |
| <i>Cell dimensions</i>                              |                                                |                                                |                                                |
| a, b, c (Å)                                         | 78.8, 113.5, 143.6                             | 76.8, 107.8, 125.8                             | 76.4, 106.6, 125.3                             |
| α, β, γ (°)                                         | 90.0, 90.0, 90.0                               | 90.0, 90.0, 90.0                               | 90.0, 90.0, 90.0                               |
| Resolution (Å)                                      | 69.11 - 3.09<br>(3.21 - 3.09)*                 | 81.82 - 3.16 (3.36 -<br>3.16)*                 | 81.19 - 3.80 (4.00 -<br>3.80)*                 |
| <sup>†</sup> R <sub>merge</sub>                     | 0.12 (1.3)                                     | 0.14 (1.4)                                     | 0.15 (1.4)                                     |
| I / σI                                              | 12.1 (1.5)                                     | 9.6 (1.2)                                      | 7.8 (1.2)                                      |
| Completeness (%)                                    | 99.9 (93.1)                                    | 96.7 (93.9)                                    | 93.7 (94.1)                                    |
| Redundancy                                          | 7.1 (6.2)                                      | 4.0 (3.7)                                      | 3.3 (2.8)                                      |
| CC1/2                                               | 0.997(0.607)                                   | 0.996 (0.648)                                  | 0.994 (0.552)                                  |
| <b>Refinement</b>                                   |                                                |                                                |                                                |
| No. reflections                                     | 24241                                          | 17865                                          | 9667                                           |
| <sup>††</sup> R <sub>work</sub> / R <sub>free</sub> | 0.232/0.295                                    | 0.264/0.325                                    | 0.278/0.321                                    |
| No. atoms                                           |                                                |                                                |                                                |
| Protein                                             | 7681                                           | 7697                                           | 7800                                           |
| Ligand/ion                                          | ---                                            | ---                                            | 112                                            |
| Water                                               | 18                                             | ---                                            | ---                                            |
| B-factors                                           |                                                |                                                |                                                |
| Protein                                             | 90.4                                           | 92.4                                           | 135.1                                          |
| Ligand/ion                                          | ---                                            | ---                                            | 192.5                                          |
| Water                                               | 62.6                                           | ---                                            | ---                                            |
| R.m.s. deviations                                   |                                                |                                                |                                                |
| Bond lengths (Å)                                    | 0.004                                          | 0.003                                          | 0.003                                          |
| Bond angles (°)                                     | 0.90                                           | 0.77                                           | 0.89                                           |
| PDB Entry                                           | 4XGT                                           | 5DZR                                           | 5E02                                           |

\*Highest resolution shell for compiling statistics determined with AIMLESS (CCP4).

$${}^{\dagger}R_{merge} = \frac{\sum_i \sum_j |I_j - \langle I_i \rangle|}{\sum_i (\sum_j I_j)}, \text{ where } I_j = \text{the intensity of the } j\text{th observation of reflection } i,$$

$\langle I_i \rangle = \text{the average intensity of reflection } i \text{ and } N_i = \text{redundancy of reflection } i.$

$${}^{\dagger\dagger}R_{work} = \frac{\sum |F_{obs} - F_{calc}|}{\sum |F_{obs}|}$$
